# Supplementary material for: Nuclear factor E2-related factor 2 (NRF2) deficiency accelerates fast fibre type transition in soleus muscle during space flight
Source: PubMed Central journal article supplement (PMC8225765; doi:10.1038/s42003-021-02334-4), 2021-06-24
Supplement: 42003_2021_2334_MOESM2_ESM.pdf [file 42003_2021_2334_MOESM2_ESM.pdf]

### **Description of Additional Supplementary Files**

**Supplementary Data 1~3** : All source data for graphs and charts presented in the main figures.

File Name: Supplementary Data 1

Description: Muscle weight

File Name: Supplementary Data 2

Description: CSA (soleus and EDL)

File Name: Supplementary Data 3

Description: Fibre type (soleus and EDL)
